# Supplementary material
Source: PubMed Central journal article supplement (PMC2857062)
Supplement: supp_M110.102517_jbc.M110.102517-1.pdf [file supp_M110.102517_jbc.M110.102517-1.pdf]

**Structural basis of membrane-targeting by the Dock180 family of  
RhoGEFs**

Lakshmanane Premkumar<sup>1,2</sup>, Andrey A. Bobkov<sup>1,2</sup>, Manishha Patel<sup>3</sup>, Lukasz Jaroszewski<sup>2</sup>, Laurie  
A. Bankston<sup>1,2</sup>, Boguslaw Stec<sup>1,2</sup>, Kristiina Vuori<sup>1</sup>, Jean-Francois Côté<sup>3</sup>, and  
Robert C. Liddington<sup>1,2</sup>

**SUPPLEMENTARY DATA**

### Figure S1. The surface loops of DHR-1

**(A) and (B) Differences between surface loops in 2 independent copies within the DHR-1 crystals.** Loops L1 (A) and L3 (B) are overlaid, with selected side chains shown. Analogous loops are typically poorly ordered in C2 domains, but in DHR-1, L1 (441-444) and L2 (Molecule A: 520-524; and Molecule B: 518-524) are connected at the  $0.7\sigma$  and  $0.6\sigma$  contour levels in a CNS  $2F_o - F_c$  density map. Residue labeling is for the conformation shown in yellow.

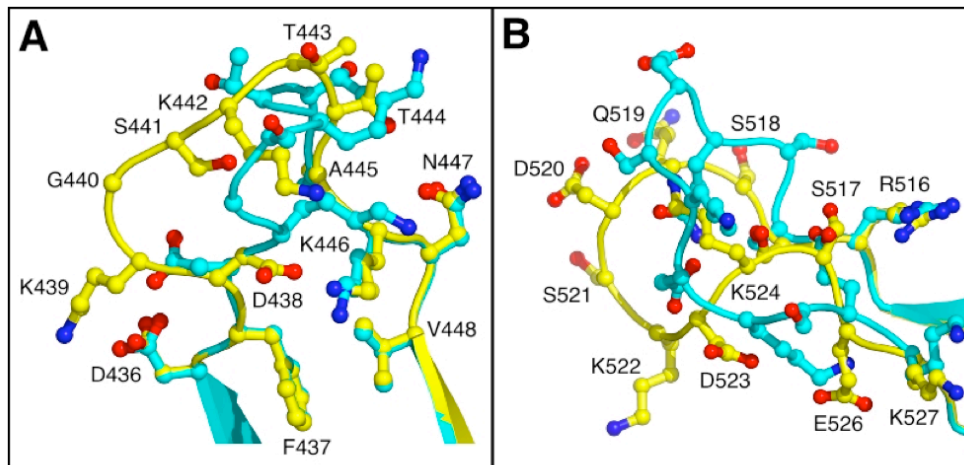

**(C) Simulated-annealing omit map (stereo image) of Molecule A.** Annealing at 1000 K in ‘torsion dynamics’ mode was performed with CNS, in which residues K446 and H515 (a  $3.5 \text{ \AA}$  sphere around these residues) were omitted from phasing. The  $2mF_o - DF_c$  map is displayed around the labeled residues at a  $1.0 \sigma$  contour.

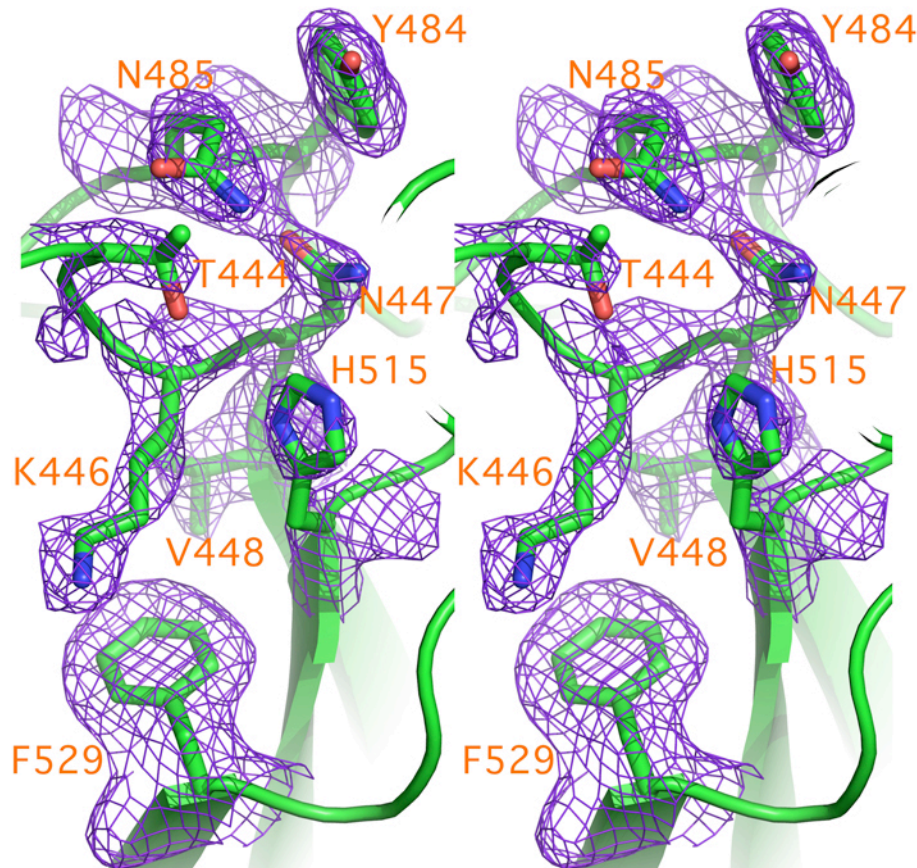

**Figure S2. DHR-1 Structural homologs assessed by DALI (Holm et al, 2008).** Top 41 closest homologs (unique sequences), ranked by “Z-score”. Z-scores above 6 are considered ‘highly significant’. Columns are: Rank, PDB code, “Z-score”, RMS difference on C $\alpha$  for the given number of aligned residues (# align). %id = % identity for the aligned residues.

| Rank | PDB  | Z    | RMSD | #align | %id | PROTEIN                                |
|------|------|------|------|--------|-----|----------------------------------------|
| 1:   | 2isd | 13.3 | 2.1  | 121    | 12  | PHOSPHOINOSITIDE PHOSPHOLIPASE C       |
| 2:   | 2enq | 12.9 | 2.8  | 143    | 10  | PtdIns(4,5) 3-KINASE ALPHA             |
| 3:   | 2qzq | 12.9 | 2.4  | 129    | 14  | DORSALIZATION ASSOCIATED PROTEIN       |
| 4:   | 1qas | 12.8 | 2.2  | 118    | 12  | PHOSPHOLIPASE C DELTA-1                |
| 8:   | 2nsq | 12.7 | 2.0  | 119    | 16  | E3 LIGASE NEDD4-LIKE PROTEIN           |
| 9:   | 1e8x | 12.6 | 2.3  | 127    | 12  | PtdIns(4,5) 3-KINASE GAMMA             |
| 10:  | 1cjy | 12.4 | 2.0  | 115    | 12  | CYTOSOLIC PHOSPHOLIPASE A2             |
| 11:  | 2nq3 | 12.3 | 2.7  | 119    | 15  | ITCHY HOMOLOG E3 LIGASE                |
| 12:  | 1rlw | 12.3 | 1.7  | 112    | 13  | PHOSPHOLIPASE A2                       |
| 13:  | 2cjt | 12.0 | 2.6  | 117    | 14  | UNC-13 HOMOLOG A                       |
| 14:  | 3jzy | 12.0 | 1.9  | 111    | 11  | INTERSECTIN 2                          |
| 15:  | 2dmh | 11.6 | 2.2  | 114    | 14  | MYOFERLIN                              |
| 16:  | 2ep6 | 11.4 | 2.0  | 112    | 13  | MCTP2                                  |
| 17:  | 1gmi | 10.8 | 2.5  | 110    | 8   | PROTEIN KINASE C, EPSILON              |
| 18:  | 1uov | 10.4 | 2.2  | 113    | 14  | SYNAPTOTAGMIN I                        |
| 19:  | 2fk9 | 10.2 | 2.4  | 108    | 11  | PROTEIN KINASE C, ETA                  |
| 20:  | 1tjx | 10.1 | 2.4  | 113    | 15  | SIMILAR TO SYNAPTOTAGMININ/P65         |
| 21:  | 1dqv | 10.0 | 3.5  | 111    | 9   | SYNAPTOTAGMIN III                      |
| 22:  | 2dmg | 9.8  | 2.6  | 116    | 10  | KIAA1228 PROTEIN                       |
| 23:  | 2uzp | 9.8  | 3.0  | 116    | 9   | PROTEIN KINASE C, GAMMA                |
| 24:  | 3fdw | 9.8  | 2.6  | 109    | 15  | SYNAPTOTAGMIN-LIKE PROTEIN 4           |
| 25:  | 1a25 | 9.8  | 2.8  | 114    | 10  | PROTEIN KINASE C, BETA                 |
| 26:  | 2bwq | 9.8  | 1.9  | 101    | 13  | RIM2 C2A                               |
| 27:  | 1wfj | 9.7  | 2.6  | 107    | 15  | PUTATIVE ELICITOR-RESPONSIVE GENE      |
| 28:  | 2jqz | 9.7  | 2.7  | 117    | 14  | HSMURF2                                |
| 29:  | 3fbk | 9.5  | 3.6  | 119    | 12  | REGULATOR OF G-PROTEIN SIGNALING 3;    |
| 30:  | 2k8m | 9.5  | 2.3  | 110    | 13  | PUTATIVE UNCHARACTERIZED PROTEIN       |
| 31:  | 2d8k | 9.4  | 2.5  | 110    | 10  | SYNAPTOTAGMIN VII                      |
| 32:  | 2k3h | 9.4  | 2.5  | 107    | 12  | RABPHILIN-3A;                          |
| 33:  | 1w15 | 9.1  | 2.1  | 102    | 14  | SYNAPTOTAGMIN IV;                      |
| 34:  | 2q3x | 9.1  | 2.5  | 111    | 11  | SYNAPTIC MEMBRANE EXOCYTOSIS REGULATOR |
| 35:  | 2z0u | 8.9  | 2.3  | 104    | 11  | WW DOMAIN-CONTAINING PROTEIN 1         |
| 36:  | 2yrb | 8.7  | 2.7  | 120    | 7   | PROTEIN FANTOM;                        |
| 37:  | 2enp | 8.3  | 2.7  | 110    | 14  | B/K PROTEIN;                           |
| 38:  | 1rh8 | 7.9  | 2.7  | 105    | 12  | PICCOLO PROTEIN                        |
| 39:  | 2enj | 7.3  | 3.0  | 102    | 14  | PROTEIN KINASE C, THETA                |
| 40:  | 1wfm | 7.1  | 3.1  | 106    | 12  | SYNAPTOTAGMIN XIII                     |
| 41:  | 1d5r | 7.0  | 2.7  | 102    | 12  | PHOSPHOINOSITIDE PHOSPHATASE PTEN      |

**Figure S3. Structural and sequence comparisons between Dock1 DHR-1 domain and PtdIns 3-kinase (2ENQ).**

**A.** Structure-based alignment from DALI, with secondary structure (H=helix; E=strand; L=loop) indicated. PtdIns 3-kinase has shorter insertions at the two insertions indicated. Sequence identity is 10%.

**$\beta$ 2- $\beta$ 3 loop**

DHR-1 NDIYVTLVQGDFDKGSKSTTAKNVEVTVSVYDEDGKRLEHVIFPGAGDEAISEYKSVIYY  
 2ENQ SALRIKILCATVNVN-IRDIDRIYVRTGIYHGGEPLC-----DNVNTQRVP---  
LEEEEEEEEEELLLLLLLLLLLLLLEEEEEEEEEELLLLLLLLLLLEELLLLLLLLLLEELLLLLLL

DHR-1 QVKQPRWFETVKVAIPIEDVNRSHLRFTFRHRSSQDKDKSEKIFFALAFVKLMRYDGTT  
 2ENQ -CSNPRWNEWLNYIYIPDLPRAARLCLSICSVKGRKGAKEEHCPLAWGNINLFDYYDTL  
LLLLLLLLLEEEEEELLLLLHHHEEEEEEEEEELLLLLLLLLLLEEEEEEEEEELLLLLLL

**$\beta$ 7- $\beta$ 8 insertion**

DHR-1 LRDGEHDLIVYKAEAKKLEDAATYLSLPSTKAELEEKSMQSLGSCTISKDSFOISTLVC  
 2ENQ TLV---SGKMALNLWPVGLEDLNPIGVTGSNP-----KETPCLEFDWF  
LLLLLEEELLEELLHHHLLHHHLLLLLHHHHLLLLLEELLEELLEEEEEEEEEEL

**B. Structural overlay (stereo).** Superposition of the DHR-1 C2 domain (violet) with the PI 3-kinase- $\gamma$  C2 domain (gray). The HEAT/ARM repeats (magenta) found in the full-length structure of PtdIns 3-kinase- $\gamma$  are also shown. Note that the helix in the  $\beta$ 7- $\beta$ 8 insertion (H3 in DHR-1), which mediates extensive interactions with the HEAT/ARM repeats in PtdIns 3-kinase- $\gamma$ , is common to both domains

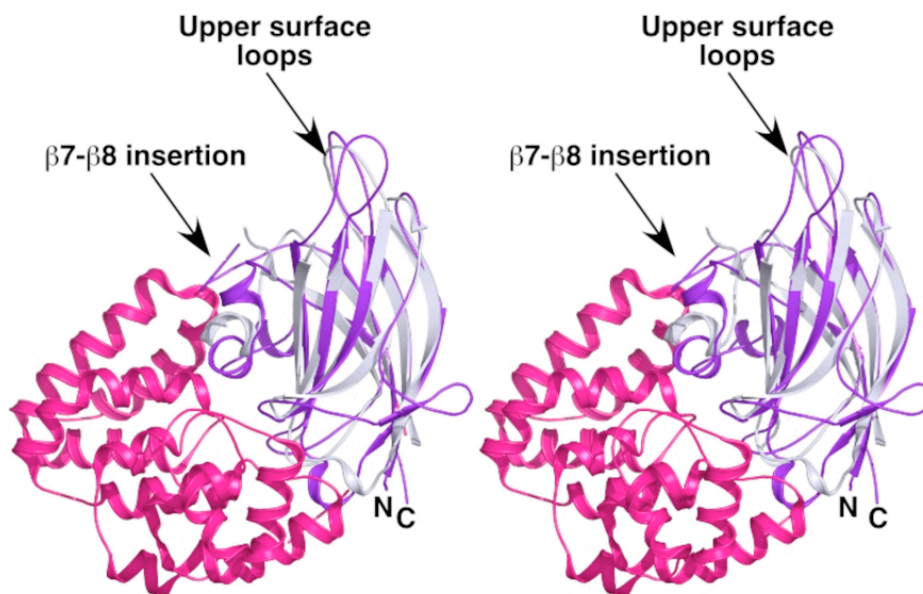

**Figure S4. ITC titration curves for phospholipid binding to DHR-1.** (A–C) Representative ITC profiles: (A) 2  $\mu\text{l}$  injections of 500  $\mu\text{M}$  PtdIns(3,4,5)P<sub>3</sub> in 145 mM NaCl titrated into a cell containing 35  $\mu\text{M}$  DHR-1. (B) 500  $\mu\text{M}$  PtdIns(4,5)P<sub>3</sub> in 14 mM NaCl titrated into 35  $\mu\text{M}$  DHR-1. (C) 500  $\mu\text{M}$  Ins(1,3,4,5)P<sub>4</sub> into 25  $\mu\text{M}$  DHR-1 (D) 584  $\mu\text{M}$  PtdIns(4,5)P<sub>2</sub> into 35  $\mu\text{M}$  DHR-1. (E–F) Competition assays. (E) 2  $\mu\text{l}$  injections of 500  $\mu\text{M}$  PtdIns(3,4,5)P<sub>3</sub> titrated into pre-equilibrated PtdIns(4,5)P<sub>2</sub>/DHR-1 (35  $\mu\text{M}$  DHR-1 + 1.5-fold molar excess of PtdIns(4,5)P<sub>2</sub>). (F) 2  $\mu\text{l}$  injections of 582  $\mu\text{M}$  PtdIns(4,5)P<sub>2</sub> titrated into pre-equilibrated PtdIns(3,4,5)P<sub>3</sub>/DHR-1 (35  $\mu\text{M}$  DHR-1 + a 1.5-fold molar excess of PtdIns(3,4,5)P<sub>3</sub>).

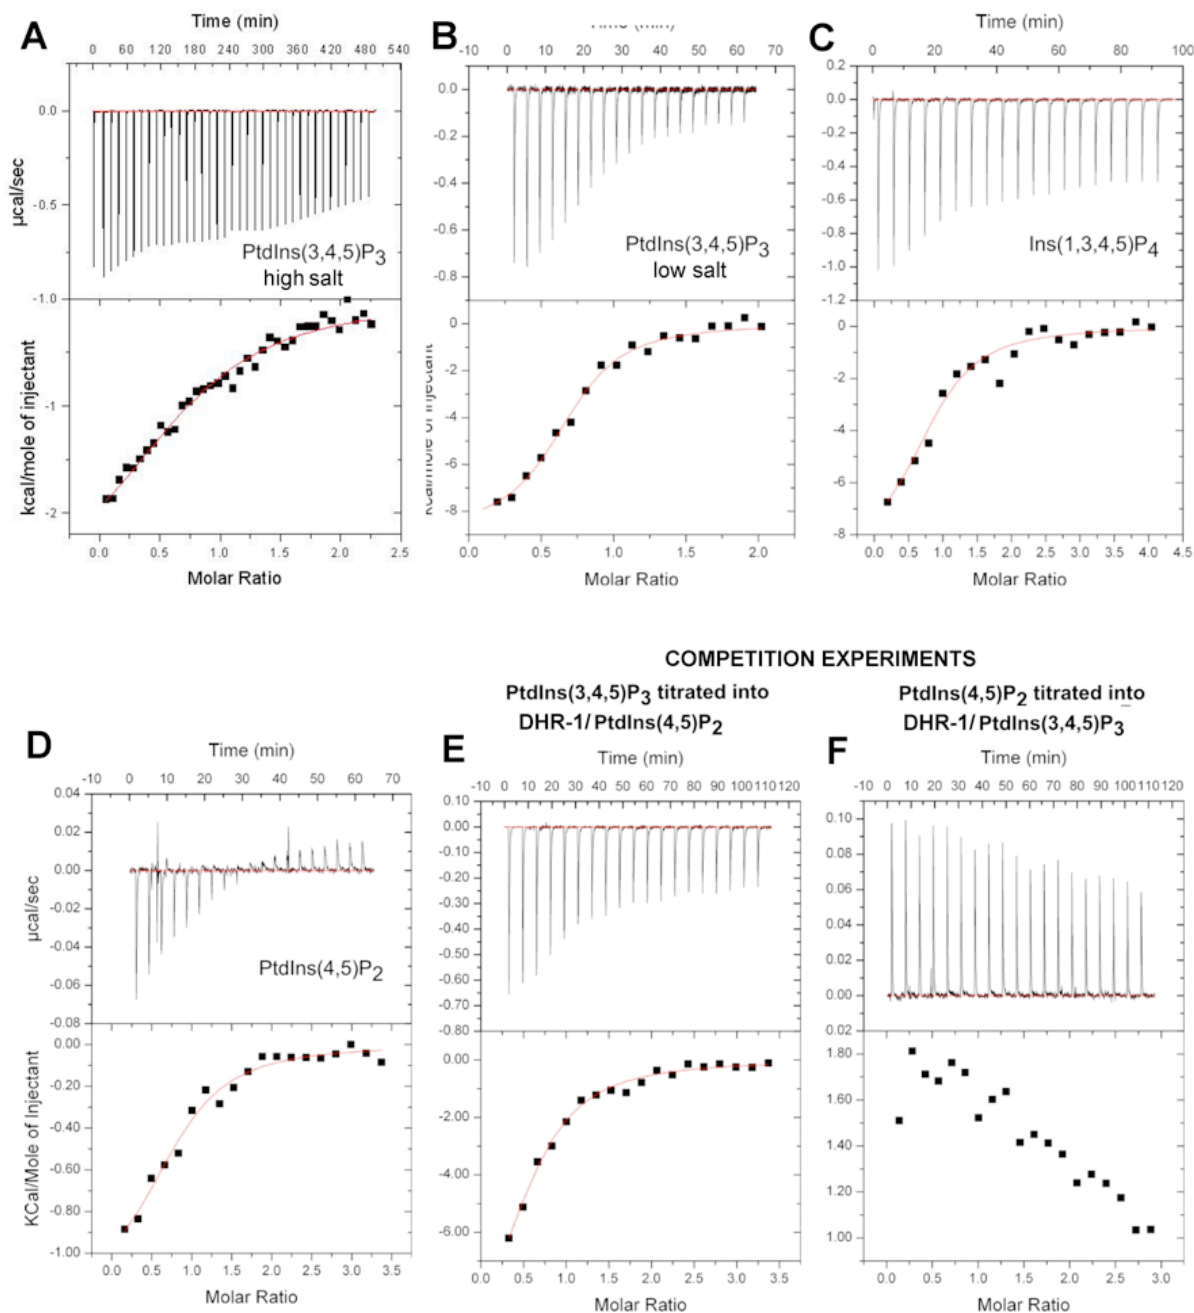

**Figure S5. Surface electrostatic potentials comparing DHR-1 with other C2 domains.** Top view looking down onto the surface loops of (A) calcium-independent and (B) calcium-dependent (left = calcium-free; right = calcium-bound) C2 domains. Electrostatic potentials calculated using APBS (Baker et al, 2001) and contoured at  $-5 \text{ kBT}/e^-$  (red) and  $+5 \text{ kBT}/e^-$  (blue). PTEN=1D5R; PtdIns3K-C2 $\alpha$ =2B3R; Syn I C2A=1BYN; PKC- $\alpha$ = 3GPE.

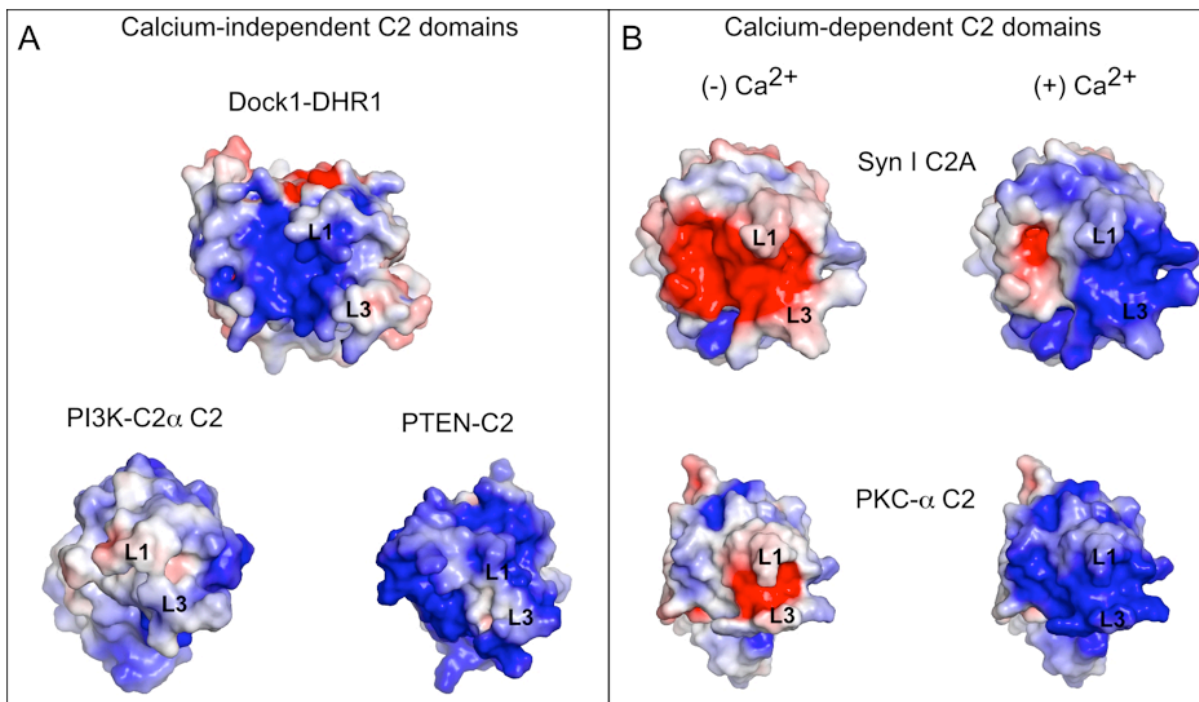



**Figure S6. Computational docking of Ins(1,3,4,5)P<sub>4</sub> into DHR-1.** (A) DHR-1 electrostatic surface map and the top 10 Ins(1,3,4,5)P<sub>3</sub> solutions as analyzed by ‘Reranking Score’ in Molegro Virtual Docker (Thomsen & Christensen, 2006). (B) Stereoview of ‘top-ranked’ PtdIns(3,4,5)P<sub>3</sub>-binding mode prediction in the β-groove (note: we found no experimental evidence supporting binding at this site). Side chain flexibility was applied during the docking procedure, and conformations observed in the crystal structure (white) and after computational docking (green) are shown; see Material and Methods for details. A stereo image of Ins(1,3,4,5)P<sub>4</sub> docked into the upper surface loops is given in the main text (Fig. 5).

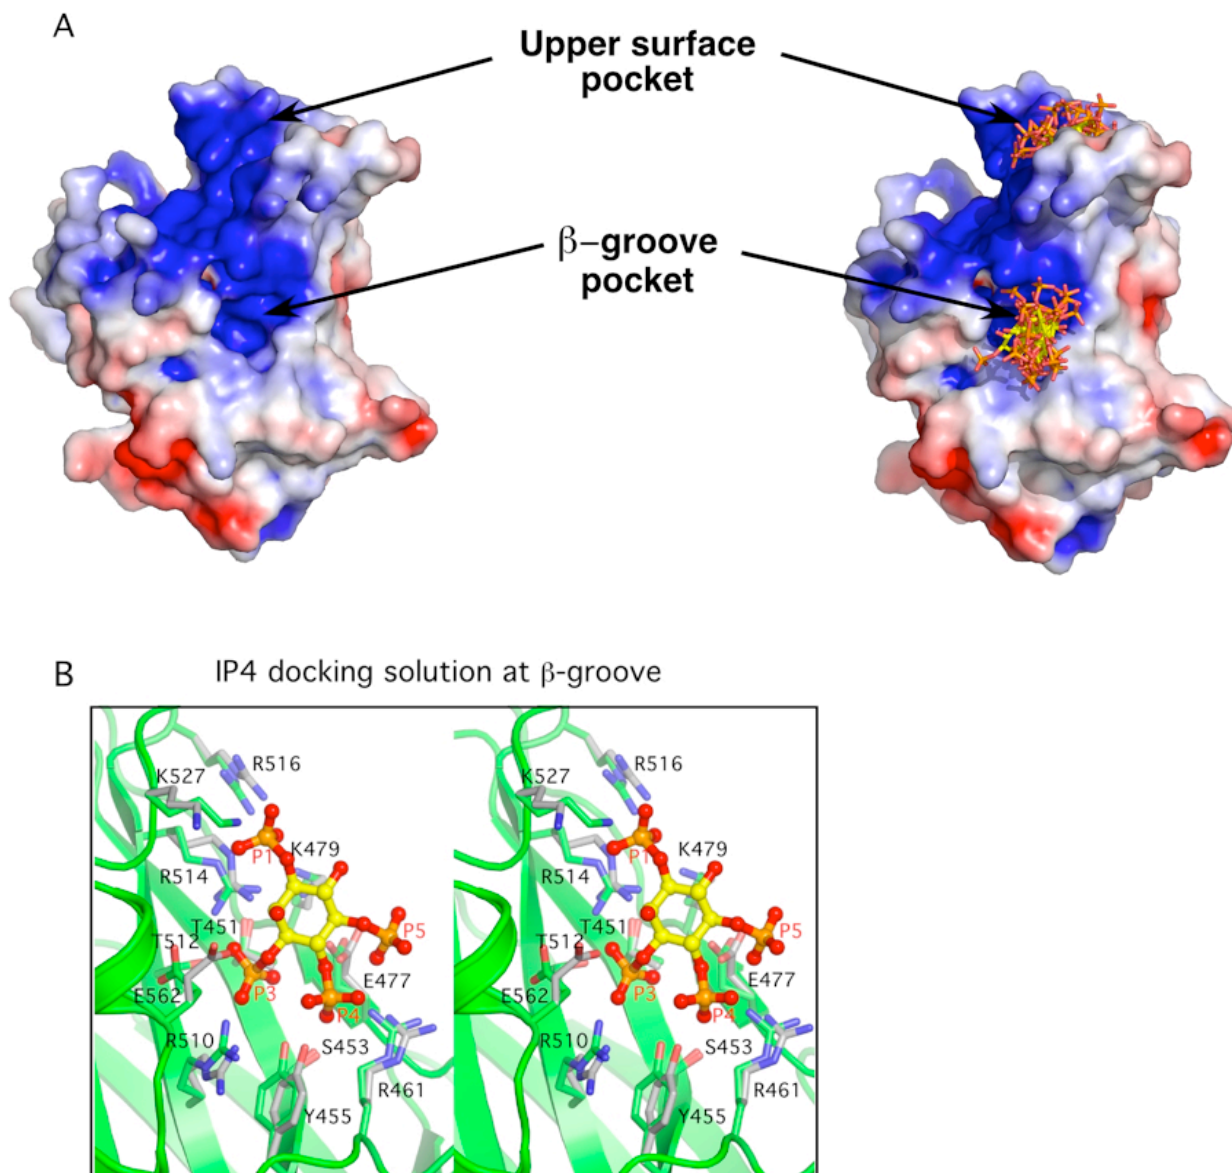

**Figure S7. PtdIns(3,4,5)P<sub>3</sub>-binding motifs in the Dock180 family.** A detailed view of the L1 and L3 alignments. The central red boxes contains residues that may interact with the phosphoinositide head-group. Red-circled residues were mutated and shown to affect binding. With the exception of the beginning of L1 (which has an irregular conformation in Dock1), the loops show an alternating pattern of basic residues consistent with extended conformations that may present the (cyan-boxed) basic residues into the PtdIns(3,4,5)P<sub>3</sub> binding pocket. However, experimental verification is clearly required. Residues boxed in green have sidechains lining the  $\beta$ -groove, but mutations at these positions had no effect on phosphoinositide binding.

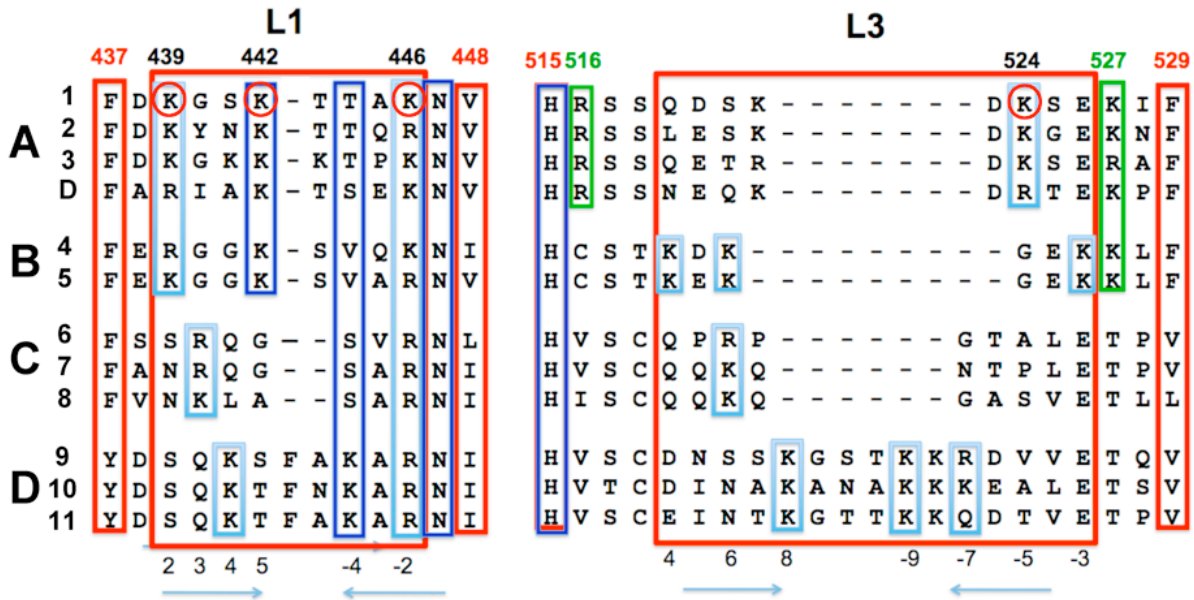



**Figure S8. Stereoview of the putative phosphoinositide binding site in the Dock9 PH domain.** (A) Superposition of the phosphoinositide binding sites of Dock9 (green) with Bruton's tyrosine kinase (yellow, PDB=1BWN) and DAPP1/PHISH (orange, PDB=1FAO). (B) Electrostatic surface potential of the Dock9 site, with Ins(1,3)P<sub>2</sub> modeled into site. Only the 3-phosphate is predicted to make strong interactions. The presence of F215 instead of the tyrosine found in other PH domains disfavors binding at the 4-phosphate position, by creating a steric clash with K182. A phosphate at the 5-position is predicted to be tolerated with little energetic consequence. The model is thus consistent with the observed preferences for PtdIns(3)P<sub>1</sub> and PtdIns(3,5)P<sub>2</sub> (Meller et al, 2008).

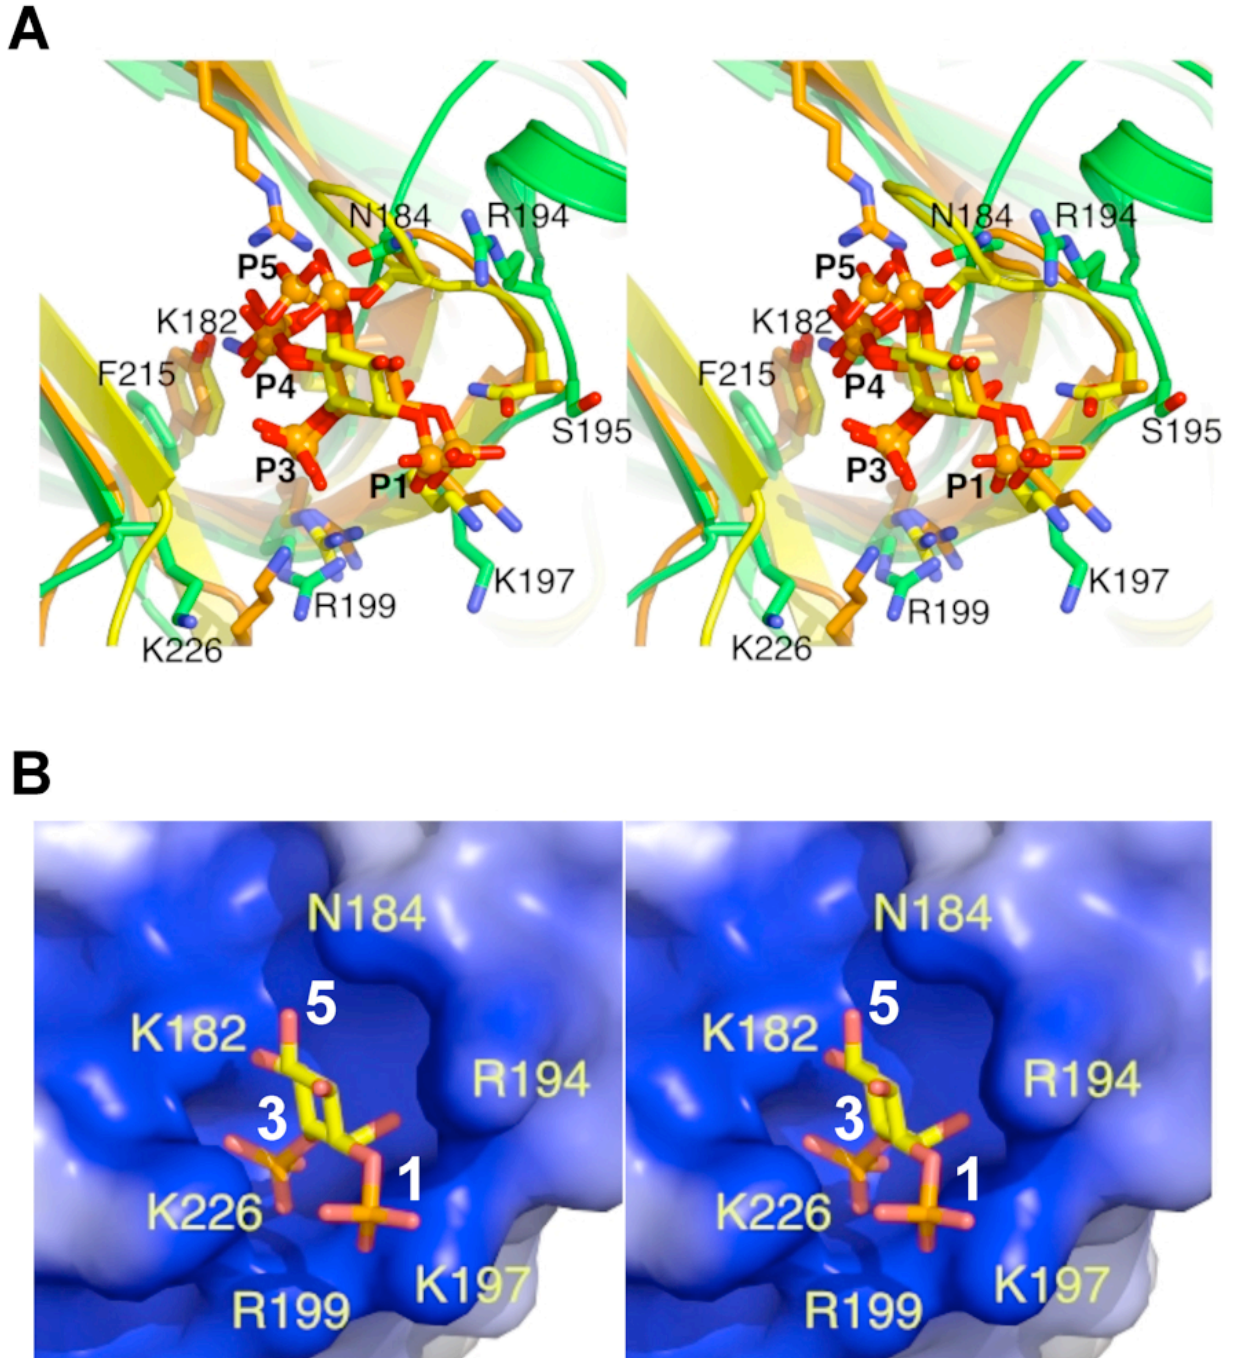

**Figure S9. 3D-Jury predictions of an ARM-repeat domain between DHR-1 and DHR-2.**

3D-Jury's top 18 unique hits based on the Dock1 sequence (residues 600–1200) are all ARM-repeat domains (classified by Families of Structurally Similar Proteins (FSSP) as 11.1.1 and by Structural Classification Of Proteins (SCOP) as a.118.1). The fold predictions accurately identify the DHR-1 and DHR-2 domain boundaries. 3DJury produces meta-predictions based on several prediction algorithms (3D-PSSM (Kelley et al, 2000), PDB-Basic (Ginalski et al, 2004b), FFAS03 (Rychlewski et al, 2000), Fugue (Rychlewski et al, 2000), mGenThreader (Jones, 1999a) and INUB (Fischer, 2003)), and scores models by their similarity to other models. Jscores above 50 indicate correct fold assignment with >90% probability (Ginalski et al, 2004a).

PP2A = Protein Phosphatase 2A; Ap1-β1 = Ap1 Clathrin Adaptor; [N] = Nuclear transport; [E] = Endocytosis; [S] = Scaffold protein

| <b>Fold Prediction Server</b> | <b>Jscore</b> | <b>PDB</b> | <b>Protein</b>          |
|-------------------------------|---------------|------------|-------------------------|
| <b>FFAS03</b>                 | 157           | 1QGK       | human importin-β [N]    |
| <b>INUB</b>                   | 157           | 1QGK       | human importin-β [N]    |
| <b>3D-PSSM</b>                | 150           | 1B3U       | human PP2A-α[S]         |
| <b>INUB</b>                   | 149           | 2BKU       | yeast importin-β [N]    |
| <b>mGenThreader</b>           | 147           | 1QGR       | human importin-β [N]    |
| <b>FFAS03</b>                 | 141           | 2BKU       | yeast importin-β [N]    |
| <b>3D-Basic</b>               | 138           | 1W63       | mouse Ap1-γ [E]         |
| <b>Fugue</b>                  | 134           | 1QGR       | human importin-β [N]    |
| <b>FFAS03</b>                 | 132           | 1W63       | mouse Ap1-γ [E]         |
| <b>FFAS03</b>                 | 131           | 1UKL       | mouse importin-β [N]    |
| <b>3D-Basic</b>               | 127           | 1W63       | mouse Ap1-β1 [E]        |
| <b>INUB</b>                   | 118           | 1W63       | mouse Ap1-γ [E]         |
| <b>Fugue</b>                  | 114           | 1B3U       | human PP2A-α[S]         |
| <b>mGenThreader</b>           | 110           | 2BKU       | yeast importin-β [N]    |
| <b>INUB</b>                   | 109           | 1B3U       | human PP2A-α[S]         |
| <b>INUB</b>                   | 104           | 1W63       | mouse Ap1-β1 [E]        |
| <b>mGenThreader</b>           | 100           | 1B3U       | human PP2A-α[S]         |
| <b>FFAS03</b>                 | 98            | 1OT8       | human transportin-1 [N] |



## References

- Baker NA, Sept D, Joseph S, Holst MJ, McCammon JA (2001) Electrostatics of nanosystems: application to microtubules and the ribosome. *Proc Natl Acad Sci U S A* **98**(18): 10037-10041
- Cole C, Barber JD, Barton GJ (2008) The Jpred 3 secondary structure prediction server. *Nucleic Acids Res* **36**(Web Server issue): W197-201
- Fischer D (2003) 3D-SHOTGUN: a novel, cooperative, fold-recognition meta-predictor. *Proteins* **51**(3): 434-441
- Ginalski K, Kinch L, Rychlewski L, Grishin NV (2004a) BOF: a novel family of bacterial OB-fold proteins. *FEBS Lett* **567**(2-3): 297-301
- Ginalski K, von Grotthuss M, Grishin NV, Rychlewski L (2004b) Detecting distant homology with Meta-BASIC. *Nucleic Acids Res* **32**(Web Server issue): W576-581
- Holm L, Kaariainen S, Rosenstrom P, Schenkel A (2008) Searching protein structure databases with DaliLite v.3. *Bioinformatics* **24**(23): 2780-2781
- Jones DT (1999a) GenTHREADER: an efficient and reliable protein fold recognition method for genomic sequences. *J Mol Biol* **287**(4): 797-815
- Jones DT (1999b) Protein secondary structure prediction based on position-specific scoring matrices. *J Mol Biol* **292**(2): 195-202
- Kelley LA, MacCallum RM, Sternberg MJ (2000) Enhanced genome annotation using structural profiles in the program 3D-PSSM. *J Mol Biol* **299**(2): 499-520
- Meller N, Westbrook MJ, Shannon JD, Guda C, Schwartz MA (2008) Function of the N-terminus of zizimin1: autoinhibition and membrane targeting. *Biochem J* **409**(2): 525-533
- Rost B (1996) PHD: predicting one-dimensional protein structure by profile-based neural networks. *Methods Enzymol* **266**: 525-539
- Rychlewski L, Jaroszewski L, Li W, Godzik A (2000) Comparison of sequence profiles. Strategies for structural predictions using sequence information. *Protein Sci* **9**(2): 232-241
- Thomsen R, Christensen MH (2006) MolDock: a new technique for high-accuracy molecular docking. *J Med Chem* **49**(11): 3315-3321
